# Supplementary material for: Charge-transfer complexes from decamethylferrocene and 1,4-quinone derivatives: neutral–ionic phase diagrams for metallocene complexes
Source: Royal Society of Chemistry journal article supplement (doi:10.1039/c1dt10200a), 2011-01-01
Supplement: c1dt10200a.pdf [file c1dt10200a.pdf]

## Supplementary information

### Charge-transfer Complexes from Decamethylferrocene and 1,4-Quinone Derivatives — Neutral–ionic Phase Diagrams for Metallocene Complexes

Tomoyuki Mochida,<sup>\*</sup> Yusuke Funasako and Hiroko Azumi

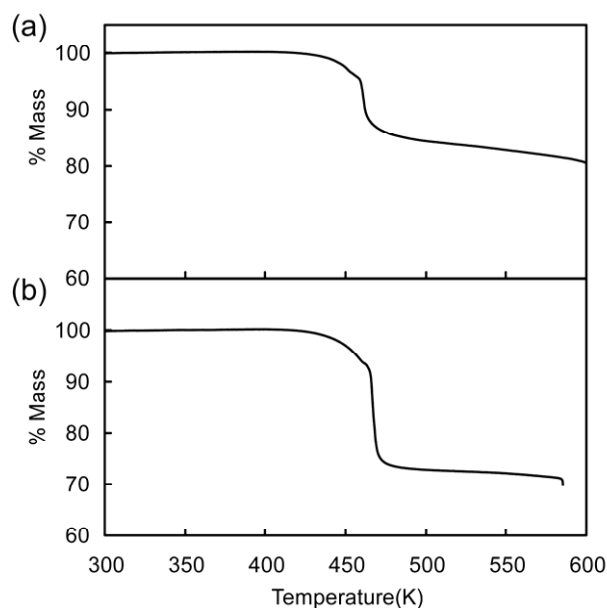

**Fig. S1.** TG traces of (a) **1** and (b) **2**.

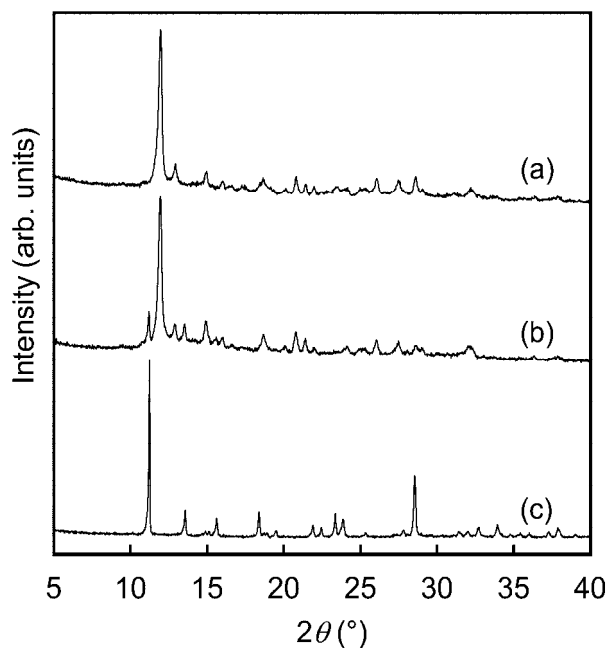

**Fig. S2.** XRD patterns of powders obtained by ball-milling of  $[\text{Fe}(\text{C}_5\text{HMe}_4)_2]$  and  $\text{Cl}_2\text{BQ}$  in the presence of a drop of dichloromethane in DA ratios of (a) 1:2 and (b) 1:1. (c) XRD pattern of a mixture of  $[\text{Fe}(\text{C}_5\text{HMe}_4)_2]$  and  $\text{Cl}_2\text{BQ}$ .

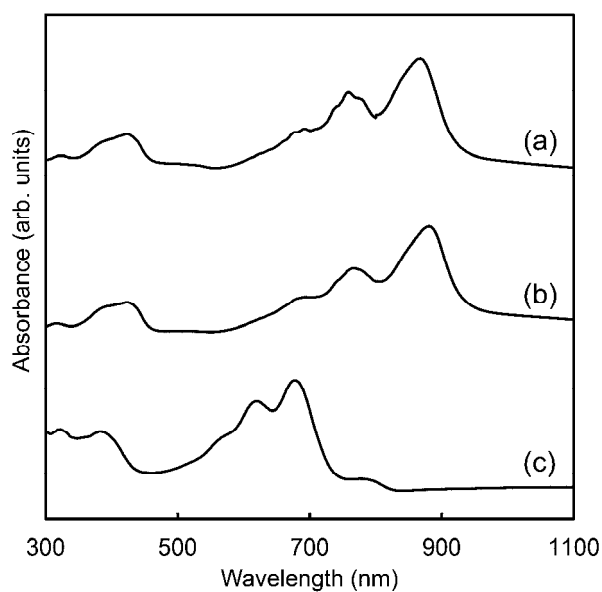

**Fig. S3.** Solid-state electronic spectra of (a)  $[\text{Fe}(\text{Cp}^*)_2][\text{TCNQ}]$ , (b)  $[\text{Fe}(\text{C}_5\text{HMe}_4)_2][\text{TCNQ}]$ , and (c)  $[\text{Fe}(\text{Cp}^*)_2][\text{DMDCNQI}]$ .

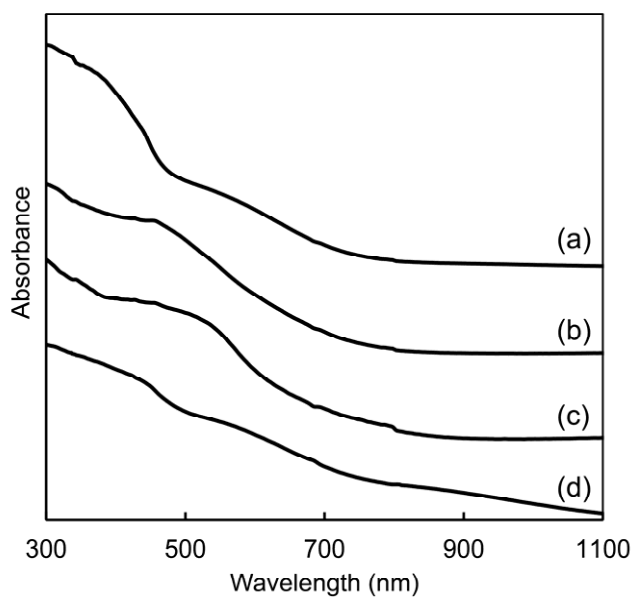

**Fig. S4.** Solid-state electronic spectra of the reaction products of  $[\text{Co}(\text{Cp}^*)_2]$  and (a)  $\text{F}_4\text{BQ}$ , (b)  $\text{Cl}_4\text{BQ}$ , (c)  $\text{Br}_4\text{BQ}$ , and (d)  $\text{Cl}_2\text{BQ}$ .

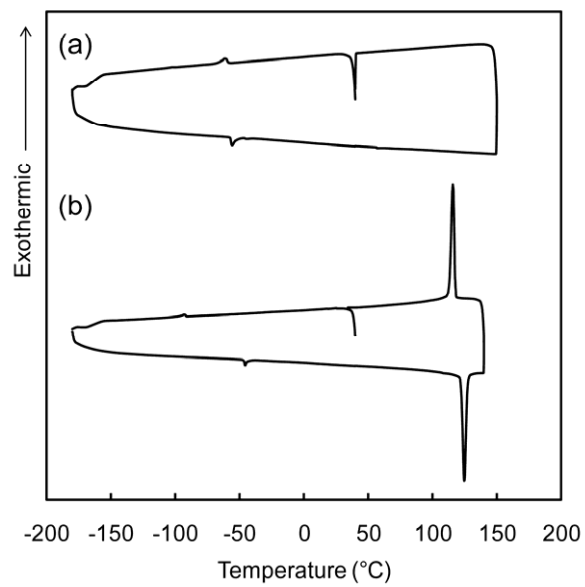

**Fig. S5.** DSC traces for (a)  $[\text{Fe}(\text{Cp}^*)_2][\text{TCNQ}]$  (1-D phase) and (b)  $[\text{Fe}(\text{C}_5\text{HMe}_4)_2][\text{TCNQ}]$ .
